# Supplementary material
Source: MDPI journal article supplement (https://www.mdpi.com/2071-1050/10/6/1923)
Supplement: s1 [file s1]

**Sustainability intervention mechanisms for managing road freight transport externalities: A systematic literature review.**

**Supplementary Data**

Appendix A1 – Compilation and details of reviewed papers

Appendix A2 – Database search extract and pre-analysis records (stage 1)

## Appendix A1: Contexts, thematic categories and outcome overview of articles in the systematic review

| No | Author                   | Year | Title                                                                                                            | Journal                                               | Methodology  | Instrumentation                      | Theory   | Context      | Theme (Intervention Mechanism)                  | Outcomes                                                                                                                                                                                                                                                                                                                                                                                 |
|----|--------------------------|------|------------------------------------------------------------------------------------------------------------------|-------------------------------------------------------|--------------|--------------------------------------|----------|--------------|-------------------------------------------------|------------------------------------------------------------------------------------------------------------------------------------------------------------------------------------------------------------------------------------------------------------------------------------------------------------------------------------------------------------------------------------------|
| 1  | Alises et al.,           | 2014 | Road freight transport decoupling: A comparative analysis between the United Kingdom and Spain                   | Transport Policy                                      | Quantitative | Decomposition analysis               | Unstated | UK and Spain | Decoupling                                      | Explores the stagnation of freight transport growth using decomposition analysis to identify and explain determining variables in the UK and Spain. Construction sector growth in Spain is found to be influencing slower decoupling rates compared to the UK, accounting for the higher road freight transport intensity measurements.                                                  |
| 2  | McKinnon, A. C.          | 2007 | Decoupling of Road Freight Transport and Economic Growth Trends in the UK: An Exploratory Analysis               | Transport Reviews                                     | Qualitative  | Explorative (decomposition) analysis | Unstated | UK           | Decoupling                                      | Paper reviews research on decoupling strategies and identifies decline in road share, offshoring, growth of service sector and decentralisation as drivers of decoupling within the UK. Advances the proposition that environmental gains from decoupling are modest at best, unless supported with other modal, policy and operational mechanisms.                                      |
| 3  | Liimatainen and Pollanen | 2013 | The impact of sectoral economic development on the energy efficiency and CO2 emissions of road freight transport | Transport Policy                                      | Quantitative | Quantitative Modelling               | Unstated | Finland      | Decoupling                                      | Examines decreasing road freight transport in Finland. The study provides a 2016 forecast update for the Finnish road freight transport sector; highlighting an 8% increase on the previous forecast levels. Fuel consumption increases are cited as a factor influencing the emissions increase and evidence points to little or no decoupling taking place within the Finnish economy. |
| 4  | Button et al.,           | 2001 | Intelligent transport systems in commercial fleet management: a study of short term economic benefits            | Transportation Planning and Technology                | Mixed        | Case Studies/ Surveys                | Unstated | USA          | ICT (Information and Communications Technology) | ICT improves productivity of freight transport drivers and also reduces stress in despatchers due to improved efficiencies. Software use for congestion mitigation is still very limited and unhelpful.                                                                                                                                                                                  |
| 5  | Crainic et al.,          | 2009 | Intelligent freight-transportation systems: Assessment and the contribution of operations research               | Transportation Research Part C: Emerging Technologies | Qualitative  | Conceptual Review                    | Unstated | Generic      | ICT (Information and Communications Technology) | Paper focuses on and assesses the main technological issues affecting freight transport, emphasizing the role of operations-based DS software for improving freight ITS performance. The importance of DS software has both policy and industry implications for ITS uptake and performance                                                                                              |
| 6  | Davies et al.,           | 2007 | Assessing the impact of ICT on UK general haulage companies                                                      | International Journal of Production Economics         | Quantitative | Survey                               | Unstated | UK           | ICT (Information and Communications Technology) | ICT is important and has a positive effect on haulage operations, enabling efficiencies, back-loading and planning. Size is instrumental to adoption with smaller firms missing out on benefits                                                                                                                                                                                          |
| 7  | Harris et al.,           | 2015 | ICT in multimodal transport and technological trends: Unleashing potential for the future                        | International Journal of Production Economics         | Qualitative  | Conceptual Review                    | Unstated | EU           | ICT (Information and Communications Technology) | Reviews 33 EU framework projects and links ICT trends to future outcomes. Paper identifies policy, user and technology barriers to ICT use for multimodal transport. Cloud computing, wireless technologies, social networking and interface technologies determined as crucial ICT modifiers for increased use in intermodal freight, helping to lower adoption barriers.               |

|    |                         |      |                                                                                                                       |                                                                       |              |                         |                 |                                      |                                                 |                                                                                                                                                                                                                                                                                                                         |
|----|-------------------------|------|-----------------------------------------------------------------------------------------------------------------------|-----------------------------------------------------------------------|--------------|-------------------------|-----------------|--------------------------------------|-------------------------------------------------|-------------------------------------------------------------------------------------------------------------------------------------------------------------------------------------------------------------------------------------------------------------------------------------------------------------------------|
| 8  | Marchet et al.,         | 2009 | An exploratory study of ICT adoption in the Italian freight transportation industry                                   | International Journal of Physical Distribution & Logistics Management | Qualitative  | Case Studies            | Unstated        | Italy                                | ICT (Information and Communications Technology) | Only operational routines are ICT supported. Even lower adoption levels for innovative applications and integrating IT platforms. Affirms the influence of size on adoption tendencies amongst firm. Lack of awareness and fragmentation inhibits integration                                                           |
| 9  | Marchet et al.,         | 2012 | Modelling the impacts of ICT adoption for inter-modal transportation                                                  | International Journal of Physical Distribution & Logistics Management | Mixed        | Modelling/ Case Studies | Unstated        | Italy                                | ICT (Information and Communications Technology) | ICT extends to gains across economic and environmental benefits for the adopting firms. ICT can improve all companies and help logistics and transport companies to improve their effectiveness and efficiencies. Important considerations extend to integration and terminal size for intermodal operations.           |
| 10 | Sternberg et al.,       | 2014 | The efficiency potential of ICT in haulier operations                                                                 | Computers in Industry                                                 | Mixed        | Case Studies            | Unstated        | Europe: Germany, Sweden, Switzerland | ICT (Information and Communications Technology) | IC benefits on individual transportation unit levels (drivers' working time) in terms of reduced work hours in the administration and waiting times associated with administration. Identifies driver's working time saving as credible ICT adoption propositions for managers to look to, in addition to fuel savings. |
| 11 | Walker and Manson       | 2014 | Telematics, urban freight logistics and low carbon road networks                                                      | Journal of Transport Geography                                        | Quantitative | Simulation              | Unstated        | UK                                   | ICT (Information and Communications Technology) | Telematics does not always lead to more efficient urban logistics. Indeed, in many cases the same outcomes can be achieved with 0% telematics as it can with 100%. Policy enforcers have important roles to play and topography is important for the application of telematics to urban freight                         |
| 12 | Wang et al.,            | 2015 | The use of ICT in road freight transport for CO2 reduction - An exploratory study of the UK's grocery retail industry | The International Journal of Logistics Management                     | Qualitative  | Case Studies            | Unstated        | UK                                   | ICT (Information and Communications Technology) | Study identifies positive correlations between ICT and CO2 emissions reduction. ICT contributes to improved energy efficiencies; better routing and scheduling at different levels. ICT also improves collaborative transport arrangements                                                                              |
| 13 | Agbo, A., and Song, T.  | 2017 | Sustainable freight transport optimisation through synchromodal networks                                              | Cogent Engineering                                                    | Quantitative | Case Modelling          | Unstated        | Africa (Ghana)                       | Modality (Inter and Co-modality)                | Synchromodality has a great potential of improving total transportation and service cost as well as, help in the reduction of road transport emissions and road congestions for great environmental benefits.                                                                                                           |
| 14 | Arnold et al.,          | 2004 | Modelling a rail/road intermodal transportation system                                                                | Transportation Research Part E: Logistics and Transportation Review   | Quantitative | Modelling               | Location theory | Europe: Iberian Peninsula            | Modality (Inter and Co-modality)                | International freight traffic is more cost sensitive to modal share variations than national traffic. Intermodal transport provides significant advantage over unimodal road, rail or water systems.                                                                                                                    |
| 15 | Banomyong and Beresford | 2001 | Multimodal transport: The case of Laotian garment exporters                                                           | International Journal of Physical Distribution & Logistics Management | Qualitative  | Modelling               | Unstated        | Lao (South East Asia)                | Modality (Inter and Co-modality)                | Inter-modality offers competitive gains and increased awareness and accessibility to exporters may offer Laotian garment exporters.                                                                                                                                                                                     |
| 16 | Bontekoning and Priemus | 2004 | Breakthrough innovations in intermodal freight transport                                                              | Transportation Planning and Technology                                | Qualitative  | Review                  | Unstated        | EU/ Generic                          | Modality (Inter and Co-modality)                | Technological and management breakthroughs are critical to intermodal freight transport. Although ICT is a viable breakthrough, uncertainties, risks and benefit perceptions limit ICT integration and                                                                                                                  |

|    |                     |      |                                                                                                                              |                                                                     |              |                                 |                             |                 |                                  |                                                                                                                                                                                                                                                        |
|----|---------------------|------|------------------------------------------------------------------------------------------------------------------------------|---------------------------------------------------------------------|--------------|---------------------------------|-----------------------------|-----------------|----------------------------------|--------------------------------------------------------------------------------------------------------------------------------------------------------------------------------------------------------------------------------------------------------|
|    |                     |      |                                                                                                                              |                                                                     |              |                                 |                             |                 |                                  | intermodal freight growth. Advocates the simultaneous or early involvement of all stakeholders at the early stages of innovation to overcome these perceptive limitations.                                                                             |
| 17 | Caris et al.,       | 2008 | Planning Problems in Intermodal Freight Transport: Accomplishments and Prospects                                             | Transportation Planning and Technology                              | Qualitative  | Review                          | Unstated                    | Generic         | Modality (Inter and Co-modality) | Reviews papers on inter-modality from a STO (Strategic, Tactical and Operational) framework. Terminal design and infrastructure configuration for network are the 2 most critical planning elements for intermodal operations                          |
| 18 | Kim, and Van Wee    | 2009 | Assessment of CO2 emissions for truck-only and rail-based intermodal freight systems in Europe                               | Transportation Planning and Technology                              | Quantitative | Life Cycle Assessment Modelling | Unstated                    | Europe          | Modality (Inter and Co-modality) | Fuel production in engines only account for between 10-12.5% of emission. Also, intermodal freight isn't always more sustainable than road freight and drayage distance affects inter-modality.                                                        |
| 19 | Li et al.,          | 2015 | Intermodal freight transport planning – A receding horizon control approach                                                  | Transportation Research Part C: Emerging Technologies               | Quantitative | Modelling/ Simulation           | Systems and Control theory  | Netherlands     | Modality (Inter and Co-modality) | Dynamic models for addressing modality in freight transport have significant limitations. RIFC models help provide time, control and cost scenarios for accurately modelling intermodal transport                                                      |
| 20 | Macharis et al.,    | 2011 | A decision support framework for intermodal transport policy                                                                 | European Transport Research Review                                  | Quantitative | Modelling                       | Unstated                    | Belgium         | Modality (Inter and Co-modality) | Inter-modality as a cost, policy and efficiency construct. DSS are critical to optimising intermodal operations. Demonstrates the viability of DSS for intermodal freight transport efficiencies.                                                      |
| 21 | Nealer et al.,      | 2011 | Modal freight transport required for production of US goods and services                                                     | Transportation Research Part E: Logistics and Transportation Review | Quantitative | Modelling                       | Unstated                    | USA             | Modality (Inter and Co-modality) | International shipping is the dominant method of freight transport, followed by trucks and rail. Decomposition strategies that help to identify trucking emissions by sectors will afford better options for targeted implementation of modal changes. |
| 22 | Rich et al.,        | 2011 | On structural inelasticity of modal substitution in freight transport                                                        | Journal of Transport Geography                                      | Quantitative | Modelling                       | Aggregation                 | EU/ Scandinavia | Modality (Inter and Co-modality) | Strong inelasticity for modal shift from trucks in the freight market. The structural inelasticity is also strongly connected to the “last-mile problem” of freight transport.                                                                         |
| 23 | Ruiz-Garcia et al., | 2007 | Review. Monitoring the intermodal, refrigerated transport of fruit using sensor networks                                     | Spanish Journal of Agricultural Research                            | Qualitative  | Conceptual Review               | Unstated                    | Generic         | Modality (Inter and Co-modality) | Efficiencies are critical to intermodal freight operations and the combination of available information technologies can provide useful efficiencies for food freight, reducing costs, improving integration and mobility                              |
| 24 | Wiegmans, B. W      | 2010 | The Freight Transport Portfolio: A New Way to Analyse Intermodal Freight Transport as Compared to Single-Mode Road Transport | Transportation Journal                                              | Quantitative | Modelling                       | Equity Portfolio Management | Europe          | Modality (Inter and Co-modality) | Reliability of rail and inland waterways as alternatives to road is still very low and the development of policies that improve reliability and cost efficiencies is crucial to intermodal arrangements                                                |
| 25 | Winebrake et al.,   | 2008 | Assessing Energy, Environmental, and Economic Trade-offs in Intermodal Freight Transportation                                | Journal of the Air & Waste Management Association                   | Quantitative | Modelling/ Case Studies         | Unstated                    | USA             | Modality (Inter and Co-modality) | Trucking holds significant time advantage over other modes of freight transport. Routing also creates emission trade-offs between CO2 and PM10 emission.                                                                                               |

|    |                                        |      |                                                                                                                        |                                                           |              |                            |          |                  |                                  |                                                                                                                                                                                                                                                                                                                                            |
|----|----------------------------------------|------|------------------------------------------------------------------------------------------------------------------------|-----------------------------------------------------------|--------------|----------------------------|----------|------------------|----------------------------------|--------------------------------------------------------------------------------------------------------------------------------------------------------------------------------------------------------------------------------------------------------------------------------------------------------------------------------------------|
| 26 | Woxenius, J                            | 2007 | Generic Framework for Transport Network Designs: Applications and Treatment in Intermodal Freight Transport Literature | Transport Reviews                                         | Qualitative  | Review/<br>Conceptual      | Unstated | EU/ Generic      | Modality (Inter and Co-modality) | Intermodal studies are still fragmented across countries, references and even meanings attached to terminologies. Convergence is essential for progressive learning.                                                                                                                                                                       |
| 27 | Aljohani, K and Thompson, R            | 2016 | Impacts of logistics sprawl on the urban environment and logistics: taxonomy and review of literature                  | Journal of Transport Geography                            | Qualitative  | Review                     | Unstated | Australia        | Operations (Design and Process)  | Address the problem of urban freight and makes some interesting contributions in terms of the impact of suburban consolidation centres on travel for road freight vehicles (suggests a converse outcome) and greater environmental impact.                                                                                                 |
| 28 | Allen et al.,                          | 2012 | Investigating relationships between road freight transport, facility location, logistics management and urban form     | Journal of Transport Geography                            | Quantitative | Survey                     | Unstated | UK               | Operations (Design and Process)  | HGV freight loads in urban areas vary according to size of the urban areas. Geographical, spatial and land use factors have influences on freight activity in urban. Also urban land use patterns affect freight intensity, impacting the balance of trade.                                                                                |
| 29 | Allen et al.,                          | 2012 | The Role of Urban Consolidation Centres in Sustainable Freight Transport                                               | Transport Reviews                                         | Qualitative  | Reviews                    | Unstated | Generic          | Operations (Design and Process)  | Improving load factor of goods vehicles through UCCs can provide km savings, reducing GHG and air quality. Public funding is required to promote UCCs, however the UCCs can become self-sustaining.                                                                                                                                        |
| 30 | Ando and Taniguchi                     | 2006 | Travel time reliability in vehicle routing and scheduling with time windows                                            | Networks and Spatial Economics                            | Quantitative | Case Study/<br>Experiments | Unstated | Japan            | Operations (Design and Process)  | Vehicle routing and scheduling can yield favourable emissions savings. VRPTW-P model reduced negative emissions in terms of CO <sub>2</sub> , NO <sub>x</sub> and PM in addition to cost savings                                                                                                                                           |
| 31 | Arvidsson, N Pazirandeh, A             | 2017 | An ex ante evaluation of mobile depots in cities: A sustainability perspective                                         | International Journal of Sustainable Transport            | Mixed        | Case Study                 | Unstated | Europe           | Operations (Design and Process)  | Addresses mobile depots in cities and advances a multimodal approach for standardized load units to make transloading easier.                                                                                                                                                                                                              |
| 32 | Boysen, N., Briskorn, D., and Emde, S. | 2018 | Scheduling electric vehicles and locating charging stations on a path                                                  | Journal of Scheduling                                     | Quantitative | Case modelling             | Unstated | Europe (Germany) | Operations (Design and Process)  | Investigate electric vehicle scheduling problem and provides an efficient heuristic solution procedure based on decomposition approach. Further addresses the charging station long-term decision problems. Study is within a restricted environment 9rail-rail shipment). Application to everyday urban road freight problems is unclear) |
| 33 | Crainic et al.,                        | 2004 | Advanced freight transportation systems for congested urban areas                                                      | Transportation Research Part C: Emerging Technologies     | Quantitative | Case Study/<br>Experiments | Unstated | Italy            | Operations (Design and Process)  | Modelling problems and scenarios on improving urban freight efficiencies within urban spaces. Finding a compromise of views and methods is vital to planning for and controlling road freight without eliminating service. Integration a key success factor                                                                                |
| 34 | Demir et al.,                          | 2011 | A comparative analysis of several vehicle emission models for road freight transportation                              | Transportation Research Part D: Transport and Environment | Quantitative | Simulation                 | Unstated | Generic          | Operations (Design and Process)  | Compares and models fuel consumption and GHG emissions. Fuel consumption varies with the size of vehicle, road gradient and speed of travel. Measurement models still vary.                                                                                                                                                                |
| 35 | Ehmke, et al.,                         | 2016 | Vehicle Routing to Minimize Time-Dependent Emissions in                                                                | European Journal of Operational                           | Quantitative | Modelling/<br>Experiment   | Unstated | Germany          | Operations (Design and           | Paper focuses on the problem of minimizing CO <sub>2</sub> emissions in the routing of vehicles in urban areas. Study adopts a methodology that                                                                                                                                                                                            |

|    |                        |      |                                                                                                                                     |                                                                     |              |                        |                                                         |                      |                                 |                                                                                                                                                                                                                                                                                                                                                                                 |
|----|------------------------|------|-------------------------------------------------------------------------------------------------------------------------------------|---------------------------------------------------------------------|--------------|------------------------|---------------------------------------------------------|----------------------|---------------------------------|---------------------------------------------------------------------------------------------------------------------------------------------------------------------------------------------------------------------------------------------------------------------------------------------------------------------------------------------------------------------------------|
|    |                        |      | Urban Areas                                                                                                                         | Research                                                            |              |                        |                                                         |                      | Process)                        | identifies emissions minimizing path and shows savings in emissions are proportion ally larger than the associated increases in duration, indicating improved emissions are achievable at a low cost. Sizes of trucks are important in the addressing emissions reductions.                                                                                                     |
| 36 | Fleischmann et al.,    | 2004 | Dynamic Vehicle Routing Based on Online Traffic Information                                                                         | Transportation Science                                              | Quantitative | Modelling              | Unstated                                                | Germany              | Operations (Design and Process) | Dynamic planning for routing and travel for freight, Flexible assignments yield better performance based on optimal AP solutions, accounting for time, empty loads and routing variations                                                                                                                                                                                       |
| 37 | Furst and Oberhofer    | 2012 | Greening road freight transport: Evidence from an empirical project in Austria                                                      | Journal of Cleaner Production                                       | Quantitative | Survey                 | Environment al Management / Theory of Planned Behaviour | Austria              | Operations (Design and Process) | Company structure and inclination to implement environmental sustainability in road freight transport. Higher number of companies do not actively practice environmental management and size and environmental management have some relationship                                                                                                                                |
| 38 | Galos et al.,          | 2015 | Reducing the energy consumption of heavy goods vehicles through the application of lightweight trailers: Fleet case studies         | Transportation Research Part D: Transport and Environment           | Qualitative  | Modelling              | Unstated                                                | UK                   | Operations (Design and Process) | Single deck trailers have better mass energy performance compared to existing double deck fleets. Reducing the empty weight of HGV trailers used in mass-limited operations can impact energy consumption savings which will lead to a reduction in both operation costs and carbon footprint                                                                                   |
| 39 | Gilpin et al.,         | 2014 | Biodiesel's and advanced exhaust after treatment's combined effect on global warming and air pollution in EU road-freight transport | Journal of Cleaner Production                                       | Quantitative | Survey                 | Unstated                                                | EU                   | Operations (Design and Process) | The independent implementation of RME biodiesel and advanced exhaust after treatment SCR and DPF in road-freight transport results in the reduction of their targeted emissions GWP100 and the life-cycle emissions of NOx, PM, CO, and NMHC, respectively. Perceived benefits associated with reduction may vary when measured independently.                                  |
| 40 | Haughton, M. A.        | 2002 | Route re-optimization's impact on delivery efficiency                                                                               | Transportation Research Part E: Logistics and Transportation Review | Quantitative | Experiment/ Simulation | Probability                                             | West Indies/ Generic | Operations (Design and Process) | Increased driver learning is critical to routing efficiencies, especially where disruptions are unpredictable. High staff retention helps to improve driver learning and invariably helps to improve routing optimisation                                                                                                                                                       |
| 41 | Lammgård and Andersson | 2014 | Environmental considerations and trade-offs in purchasing of transportation services                                                | Research in Transportation Business and Management                  | Quantitative | Survey                 | *Process                                                | Sweden               | Operations (Design and Process) | Reliability, Quality and Price are at the apex of the decision making agenda for logistics managers in the selection of transport providers. Market coverage is equally important but environmental importance has little and unchanged significance over 9 years (2003-2012).                                                                                                  |
| 42 | Li, et al.,            | 2015 | Oil-saving pathways until 2030 for road freight transportation in China based on a cost-optimization model                          | Energy                                                              | Quantitative | Modelling              | Unstated                                                | China                | Operations (Design and Process) | The cost-effective GHG emission reduction target of developing alternative fuels should be set below the turn point for road freight transport. diesel and gasoline will remain the dominant fuels over the planning horizon, because the deployment scale of biofuel and natural gas was constrained by resource supply and construction speed of filling station respectively |

|    |                         |      |                                                                                                                                  |                                                                                                   |              |                |                 |                        |                                 |                                                                                                                                                                                                                                                                                                                                                                                                                                                                                                                                                                                                                                                       |
|----|-------------------------|------|----------------------------------------------------------------------------------------------------------------------------------|---------------------------------------------------------------------------------------------------|--------------|----------------|-----------------|------------------------|---------------------------------|-------------------------------------------------------------------------------------------------------------------------------------------------------------------------------------------------------------------------------------------------------------------------------------------------------------------------------------------------------------------------------------------------------------------------------------------------------------------------------------------------------------------------------------------------------------------------------------------------------------------------------------------------------|
| 43 | Liimatainen, et al.,    | 2014 | Energy efficiency of road freight hauliers-A Nordic comparison                                                                   | Energy Policy                                                                                     | Quantitative | Survey         | Unstated        | Europe (Nordic Region) | Operations (Design and Process) | Examined decarbonisation EEI practices of hauliers in 4 Nordic countries, replicating an earlier study in Finland. EEI reporting helps to improve environmental performance and the effect of EEI as a tool for comparison revealed very similar trends across all four counties.                                                                                                                                                                                                                                                                                                                                                                     |
| 44 | Matthias Klumpp         | 2016 | To Green or Not to Green: A political, economic and social analysis for the past failures of green logistics                     | Sustainability                                                                                    | Quantitative | Case Modelling | Jevon's Paradox | Europe (Germany)       | Operations (Design and Process) | Analyses the reasons for the current failure of green logistics by drawing on political, economic and business as well as social motivations to highlight challenges with the greening of logistics. The share of greenhouse gas emissions by the transportation and logistics sector in Europe rose from 16.6% in 1990 to 24.3% in 2012. Jevons paradox to address the rebound effect of technology efficiencies in logistics. Technological efficiencies may be inadvertently advancing emissions and carbon energy demand. Median voter preferences and impact on policy. Taxation is presented as a viable tool for effecting consumption change. |
| 45 | McKinnon and Ge         | 2006 | The potential for reducing the empty running by trucks; a retrospective analysis                                                 | International Journal of Physical Distribution & Logistics Management                             | Quantitative | Survey         | Unstated        | UK                     | Operations (Design and Process) | This analysis suggests that, across the 29 vehicle fleets sampled, there was very limited potential for reducing the distance that the trucks ran empty. It highlights the effects of operational constraints on back-loading, particularly, where the average length of haul is short, the scheduling is tight and a large proportion of freight requires refrigeration.                                                                                                                                                                                                                                                                             |
| 46 | Midgley and Cebon       | 2015 | Control of a hydraulic regenerative braking system for a heavy goods vehicle                                                     | Proceedings of the Institution of Mechanical Engineers, Part D: Journal of Automobile Engineering | Quantitative | Secondary Data | Unstated        | UK                     | Operations (Design and Process) | Three global optimisation techniques for breaking systems in HGVs were investigated over four standard driving cycles. The greedy algorithm was identified as the only algorithm that can operate in real time, yielding an Elv decrease of 9–17%, depending on the driving cycle. Also highlights problems with accurate data for predictive controllers.                                                                                                                                                                                                                                                                                            |
| 47 | Midgley et al.,         | 2013 | Modelling of hydraulic regenerative braking systems for heavy vehicles                                                           | Proceedings of the Institution of Mechanical Engineers, Part D: Journal of Automobile Engineering | Quantitative |                | Unstated        | UK                     | Operations (Design and Process) | Examines breaking systems in HGVs, finding gain efficiencies from simulation, with corresponding fuel and energy savings. Gains on fuel consumption could be as high as 29.4%.                                                                                                                                                                                                                                                                                                                                                                                                                                                                        |
| 48 | Moreno-Quintero et al., | 2013 | Modelling planner-carrier interactions in road freight transport: Optimisation of road maintenance costs via overloading control | Transportation Research Part E: Logistics and Transportation Review                               | Quantitative | Modelling      | Unstated        | Mexico                 | Operations (Design and Process) | Extends methods for modelling multi-actor approaches in freight transport from a policy perspective. The bi-level approach allows for hierarchical designations within the model with significant outcomes for different actors, thereby enabling policy planners achieve better and more acceptable policies                                                                                                                                                                                                                                                                                                                                         |
| 49 | Morrison et al.,        | 2013 | Effects of longer heavy vehicles on traffic congestion                                                                           | Proceedings of the Institution of Mechanical                                                      | Quantitative | Simulation     | Unstated        | UK                     | Operations (Design and          | The study indicates that the introduction of LHV's to UK roads would have very little effect on motorway traffic congestion, with potential of very little decrease in congestion although LHV's would                                                                                                                                                                                                                                                                                                                                                                                                                                                |

|    |                               |      |                                                                                                                                                               |                                                                       |              |                     |                                     |                 |                                 |                                                                                                                                                                                                                                                                                                                                                                                                                                                                                                                       |
|----|-------------------------------|------|---------------------------------------------------------------------------------------------------------------------------------------------------------------|-----------------------------------------------------------------------|--------------|---------------------|-------------------------------------|-----------------|---------------------------------|-----------------------------------------------------------------------------------------------------------------------------------------------------------------------------------------------------------------------------------------------------------------------------------------------------------------------------------------------------------------------------------------------------------------------------------------------------------------------------------------------------------------------|
|    |                               |      |                                                                                                                                                               | Engineers, Part C: Journal of Mechanical Engineering Science          |              |                     |                                     |                 | Process)                        | significantly reduce energy consumption compared to HGVs                                                                                                                                                                                                                                                                                                                                                                                                                                                              |
| 50 | Newnam and Goode              | 2015 | Do not blame the driver: A systems analysis of the causes of road freight crashes                                                                             | Accident Analysis and Prevention                                      | Qualitative  | ACCIMAP             | Systems theory                      | Australia       | Operations (Design and Process) | Socio-technical perspective to road freight transport externalities. Administrative faults and management faults as key causes of HGV accidents.                                                                                                                                                                                                                                                                                                                                                                      |
| 51 | Olsson and Woxenius           | 2014 | Localisation of freight consolidation centres serving small road hauliers in a wider urban area: Barriers for more efficient freight deliveries in Gothenburg | Journal of Transport Geography                                        | Quantitative | Case study/ Surveys | Unstated                            | Sweden          | Operations (Design and Process) | Time is more important than cost in urban freight planning and clustering FCCs close to freight providers can improve efficiencies, helping to address congestion queries within urban centres. By clustering or consolidating around FCCs, shippers can also reduce vehicle kms and corresponding emissions.                                                                                                                                                                                                         |
| 52 | Ozen and Tuydes-Yaman         | 2013 | Evaluation of emission cost of inefficiency in road freight transportation in turkey                                                                          | Energy Policy                                                         | Quantitative | Survey              | Unstated                            | Turkey          | Operations (Design and Process) | 22.3% of empty running in 2009, accounting for over 42% of emissions. Emission reduction savings could be gained from policy initiatives that address empty running. Additional implementation of Euro IV standards could drive down GHG by up to 40% in some cases.                                                                                                                                                                                                                                                  |
| 53 | Palsson and Kovács,           | 2014 | Reducing transport emissions: A reaction to stakeholder pressure or a strategy to increase competitive advantage                                              | International Journal of Physical Distribution & Logistics Management | Quantitative | Survey              | RBV/ Stakeholder                    | Sweden          | Operations (Design and Process) | Greening freight transportation is both a response to external pressure and internal management strategy. Stakeholder pressure sets the minimal acceptance levels whilst RBV explains the competitive factors of sustainability                                                                                                                                                                                                                                                                                       |
| 54 | Pérez-Martínez, P. J.         | 2009 | The vehicle approach for freight road transport energy and environmental analysis in Spain                                                                    | European Transport Research Review                                    | Quantitative | Surveys/ PRFSS      | Unstated                            | Spain           | Operations (Design and Process) | Paper reviews some key indicators of efficiency in road freight performance in Spain. Identifies a 0.2% increase in energy and environmental efficiencies using the PRFSS model to analyse data between 1997 and 2003. Also short and medium distances, 9–112 km, are critical as small increments within this distance range produce high increments on transport content and therefore high environmental impacts. It asserts that internalisation of external costs can lead to energy savings and CO2 reductions. |
| 55 | Rogerson, S                   | 2017 | Influence of freight transport purchasing processes on logistical variables related to CO2 emissions: A case study in Sweden                                  | International Journal of Logistics Research and Applications          | Qualitative  | Case study          | Unstated                            | Europe (Sweden) | Operations (Design and Process) | Paper examines how freight transport purchasing process influences logistics variables, adopting a purchasing model perspective. Highlights the import of contractual specification in the outsourcing of logistics by managers.                                                                                                                                                                                                                                                                                      |
| 56 | Rogerson, S., and Sallnas, U. | 2016 | Internal coordination to achieve high load factor                                                                                                             | International Journal of Logistics Management                         | Qualitative  | Case Study          | Mintzberg's coordination mechanisms | Europe          | Operations (Design and Process) | Paper examines load factor constraints exploring them from a shipper's coordination perspective. It clarifies the importance of internal coordination in order to achieve high load factor. Also provides a substantial list of activities that could be coordinated to                                                                                                                                                                                                                                               |



|    |                              |      |                                                                                                                                                                    |                                                                  |              |                          |                |                  |                                 |                                                                                                                                                                                                                                                                                                                                                                                                                                                                                                             |
|----|------------------------------|------|--------------------------------------------------------------------------------------------------------------------------------------------------------------------|------------------------------------------------------------------|--------------|--------------------------|----------------|------------------|---------------------------------|-------------------------------------------------------------------------------------------------------------------------------------------------------------------------------------------------------------------------------------------------------------------------------------------------------------------------------------------------------------------------------------------------------------------------------------------------------------------------------------------------------------|
|    |                              |      |                                                                                                                                                                    |                                                                  |              |                          |                |                  |                                 | realise the goal of high load factor.                                                                                                                                                                                                                                                                                                                                                                                                                                                                       |
| 57 | Sanchez-Rodrigues, et al.,   | 2014 | Developing “Extra Distance” as a measure for the evaluation of road freight transport performance                                                                  | International Journal of Productivity and Performance Management | Qualitative  | Case Studies (Workshops) | Unstated       | UK/ South Africa | Operations (Design and Process) | The “Extra Distance” measure was applied to quantify the effects of disruptions that can occur in road freight transport networks with adverse effect on profit margins. Late notification of deliveries, size, loading schedules, congestion and road restrictions were highlighted as main sources of extra distance costs, Operations integration is identified as a viable means of reducing extra distance incidents, mitigating losses by 80% in one instance, with energy and emissions implications |
| 58 | Schiffer, M., and Walther, G | 2017 | The electric location routing problem with time windows and partial recharging                                                                                     | European Journal of Operational Research                         | Quantitative | Case Modelling           | Unstated       | Europe           | Operations (Design and Process) | Employs a location routing approach to consider routing of electric vehicles and siting decisions for charging stations simultaneously in order to support strategic decisions of logistics fleet operators. Advances a more robust model for integrating siting and refuelling decisions in EV VRP optimisation                                                                                                                                                                                            |
| 59 | Soleimani et al.,            | 2018 | Collection and distribution of retrained -remanufactured products in a vehicle routing problem with pickup and delivery considering sustainable and green criteria | Journal of Cleaner Production                                    | Quantitative | Case study               | Fuzzy          | Europe           | Operations (Design and Process) | Paper proposes a multi- objective non-linear programming model for the green vehicle routing problem (GVRP), including original and remanufactured products distribution (both delivery and pickup) of end of life (EOL) products. Results suggest improved performance under the model configurations and proposed solution approach with potential to reduce fuel, cost and pollution impacts                                                                                                             |
| 60 | Sternberg et al.,            | 2013 | Who controls the fleet? Initial insights into road freight transport planning and control from an industrial network perspective                                   | International Journal of Logistics Research and Applications     | Qualitative  | Case Study               | Network theory | Switzerland      | Operations (Design and Process) | Discusses road haulage as a complex operation with implications for control and coordination. Integration of planning and control through ICT needs to overcome fragmented barriers within the industry.                                                                                                                                                                                                                                                                                                    |
| 61 | Ubogu et al.,                | 2011 | Port-hinterland trucking constraints in Nigeria                                                                                                                    | Journal of Transport Geography                                   | Quantitative | Survey                   | Unstated       | Nigeria          | Operations (Design and Process) | Operational issues in the Nigeria context. Nuances of security, policy bottlenecks, infrastructure etc. as key limitations to sustainability within road freight operations                                                                                                                                                                                                                                                                                                                                 |
| 62 | Velázquez-Martínez et al.,   | 2016 | A new statistical method of assigning vehicles to delivery areas for CO2 emissions reduction                                                                       | Transportation Research Part D: Transport and Environment        | Quantitative | Modelling/ Experiment    | Unstated       | Mexico           | Operations (Design and Process) | Evaluates the effect of delivery conditions on freight vehicle performance. Empirical findings from Mexico suggest matching vehicle to environment topography can reduce emissions from delivery. Fleet design choices affect emissions savings from road freight transport.                                                                                                                                                                                                                                |
| 63 | Wang et al.,                 | 2017 | Internalisation of negative external cost of green logistics and incentive mechanism                                                                               | Advances in Mechanical Engineering                               | Quantitative | Case Modelling           | Unstated       | China            | Operations (Design and Process) | Highlights differences in externality costings for enterprise and government cases, suggesting parallels between government subsidies and greening of logistics by enterprises when certain conditions remain constant. It links externality changes to freight rates                                                                                                                                                                                                                                       |
| 64 | Wang, et al.,                | 2014 | Operational transportation planning of freight forwarding companies in horizontal                                                                                  | European Journal of Operational Research                         | Quantitative | Modelling                | Unstated       | Germany          | Operations (Design and Process) | To improve operational efficiencies, forwarders have to reorganize their internal processes for better management of external relations to partners in both vertical and horizontal cooperation.                                                                                                                                                                                                                                                                                                            |

|    |                                        |      |                                                                                                                                                            |                                                                       |              |                         |          |                |                         |                                                                                                                                                                                                                                                            |
|----|----------------------------------------|------|------------------------------------------------------------------------------------------------------------------------------------------------------------|-----------------------------------------------------------------------|--------------|-------------------------|----------|----------------|-------------------------|------------------------------------------------------------------------------------------------------------------------------------------------------------------------------------------------------------------------------------------------------------|
|    |                                        |      | coalitions                                                                                                                                                 |                                                                       |              |                         |          |                |                         | Systematic considerations that combine routing, computational simulation can help reduce cost of subcontracting by up to 10%.                                                                                                                              |
| 65 | Alho, and de Abreu e Silva             | 2014 | Analysing the relation between land-use/urban freight operations and the need for dedicated infrastructure/enforcement - Application to the city of Lisbon | Research in Transportation Business and Management                    | Mixed        | Modelling/ Case Studies | Unstated | Portugal       | Other                   | Illegal parking by non-freight vehicles impacts road freight performance. Better planning and enforcement will improve congestion and aid efficiency in urban freight deliveries                                                                           |
| 66 | Carballo-Penela et al.,                | 2012 | From the motorways of the sea to the green corridors' carbon footprint: the case of a port in Spain                                                        | Journal of Environmental Planning and Management                      | Quantitative |                         | Unstated | Spain          | Other (Green Corridors) | Carbon strategies built around various stakeholders are vital to the success of green corridor initiatives. Indirect emissions have to be taken into account in emissions management.                                                                      |
| 67 | Demir et al.,                          | 2014 | A review of recent research on green road freight transportation                                                                                           | European Journal of Operational Research                              | Qualitative  | Review                  | Unstated | Generic        | Other                   | Other factors besides routing and travel minimisation affect energy consumption in road freight. Speed, load weight and road gradient also determine consumption. Driver working hours may impact efficiencies and sustainability.                         |
| 68 | Figliozi, M. A                         | 2011 | The impacts of congestion on time-definitive urban freight distribution networks CO2 emission levels: Results from a case study in Portland, Oregon        | Transportation Research Part C: Emerging Technologies                 | Quantitative | Modelling/ Case Studies | Unstated | USA            | Other                   | Uncongested travel reduces emissions, although the impact of congestion on freight vehicle emissions is difficult to forecast.                                                                                                                             |
| 69 | Islam et al.,                          | 2013 | Performance evaluation of an online benchmarking tool for European freight transport chains                                                                | Benchmarking: An International Journal                                | Mixed        | Survey/ interview       | Unstated | EU             | Other                   | Cost is the most important indicator in evaluating freight transport performance. Use of information technology for planning and benchmarking still not prevalent in the road freight industry                                                             |
| 70 | Khorheh et al.,                        | 2015 | Socio-environmental performance of transport systems                                                                                                       | Management of Environmental Quality: An International Journal         | Quantitative | Survey                  | Unstated | Australia      | Other                   | Logistics perceptions have gone beyond economic considerations. Political, socio-economic, infrastructure and technological solutions impact road freight transport but technology has the most significant impact on environmental and social performance |
| 71 | Kinnear et al.,                        | 2015 | Emissions Reporting in the Australian Road Freight Transport Sector: Is There a Better Method than the Default Option?                                     | International Journal of Sustainable Transportation                   | Quantitative | Modelling/ Case Studies | Unstated | Australia      | Other                   | Makes case for the migration from default reporting methodologies to NGERS reporting as a means of reducing emissions.                                                                                                                                     |
| 72 | Lagorio, A., Pinto, R., and Golini, R. | 2016 | Research in urban logistics: a systematic review                                                                                                           | International Journal of Physical Distribution & Logistics Management | Mixed        | Citation network        | Unstated | Europe (Italy) | Other (Review)          | Fragmentations in the urban logistics literature and some directions on trends and future research directions                                                                                                                                              |

|    |                                               |      |                                                                                                               |                                                     |              |                         |                    |           |        |                                                                                                                                                                                                                                                                                                                                                                                                                                                                                                                                                          |
|----|-----------------------------------------------|------|---------------------------------------------------------------------------------------------------------------|-----------------------------------------------------|--------------|-------------------------|--------------------|-----------|--------|----------------------------------------------------------------------------------------------------------------------------------------------------------------------------------------------------------------------------------------------------------------------------------------------------------------------------------------------------------------------------------------------------------------------------------------------------------------------------------------------------------------------------------------------------------|
| 73 | Marchet, Gino; Melacini, Marco; Sara, Perotti | 2014 | Environmental Sustainability in Logistics and freight transportation: A literature review and research agenda | Journal of Manufacturing Technology Management      | Qualitative  | Conceptual Review       | Unstated           | Generic   | Other  | Although researchers have started to examine the decision-making process involved in environmental sustainability adoption in recent years, many themes, such as sustainability evaluation and measurement, and the level of adoption of sustainability initiatives in the context of the third-party logistics (3PL) industry are under-represented in the literature. articles are either conceptual papers or empirical studies (i.e. mostly based on surveys or case studies), while simulation and analytical modelling have rarely been addressed. |
| 74 | Pan et al.,                                   | 2013 | The reduction of greenhouse gas emissions from freight transport by pooling supply chains                     | International Journal of Production Economics       | Quantitative | Modelling/ Case Studies | Unstated           | France    | Other  | Joint road and rail transport is a significant way to reduce CO2 emissions, provided the electrically powered train generates low emissions in France. Alternatively, the study affirms that a single transport mode can yield similar emission reduction and cost savings through the consolidation of supply network                                                                                                                                                                                                                                   |
| 75 | Pérez-Martínez and Vassallo-Magro             | 2013 | Changes in the external costs of freight surface transport in Spain                                           | Research in Transportation Economics                | Quantitative | Modelling               | Unstated           | Spain     | Other  | Policy measures driving modality, vehicle load distribution and fuel efficiencies are helping to address external cost from road freight in Spain. Also highlights some difficulties with predictions from existing data structures.                                                                                                                                                                                                                                                                                                                     |
| 76 | Ballantyne et al.,                            | 2013 | A comparative study of urban freight transport planning: Addressing stakeholder needs                         | Journal of Transport Geography                      | Qualitative  | Survey/ interview       | Stakeholder Theory | Europe    | Policy | Local council awareness of urban freight issues and the capacity to regulate urban freight as actors or just stakeholders.                                                                                                                                                                                                                                                                                                                                                                                                                               |
| 77 | Behrends, Sönke                               | 2016 | Burden or opportunity for modal shift? – Embracing the urban dimension of intermodal road-rail transport      | Transport Policy                                    | Qualitative  | Review                  | Unstated           | Europe    | Policy | Examines the role of urban planning in the development of multimodal transport. Highlights some measures to improve IRRT synchronisation and reduce the environmental impact of urban freight. The results emphasise that growth of rail freight without negative consequences for the sustainability of urban areas can only be achieved by appropriate actions that demonstrate an understanding of the urban context within which IRRT takes place                                                                                                    |
| 78 | Cristea et al.,                               | 2013 | Trade and the greenhouse gas emissions from international freight transport                                   | Journal of Environmental Economics and Management   | Quantitative | Modelling               | Unstated           | Worldwide | Policy | Extensive world trade data is used to model international output and transport comparisons. Study identifies international transport as responsible for 33% of emissions. Strengthens the body of work on coupling between economic growth, freight transport and emissions with some important considerations for policy makers.                                                                                                                                                                                                                        |
| 79 | Dablanc, L.                                   | 2007 | Goods transport in large European cities: Difficult to organize, difficult to modernize                       | Transportation Research Part A: Policy and Practice | Qualitative  | Observation/ Review     | Unstated           | Europe    | Policy | Slowdown in logistics infrastructure and facilities is attributed to cost considerations, further exacerbating the logistics urban distribution problem. Two principal administrative policy recommendations are made; simplification of planning process for city access and practitioner focused approach to policy development for urban freight.                                                                                                                                                                                                     |

|    |                                         |      |                                                                                                                                                                |                                                           |              |                                   |          |                    |        |                                                                                                                                                                                                                                                                                                                                                                                                                                                                                                    |
|----|-----------------------------------------|------|----------------------------------------------------------------------------------------------------------------------------------------------------------------|-----------------------------------------------------------|--------------|-----------------------------------|----------|--------------------|--------|----------------------------------------------------------------------------------------------------------------------------------------------------------------------------------------------------------------------------------------------------------------------------------------------------------------------------------------------------------------------------------------------------------------------------------------------------------------------------------------------------|
| 80 | Eom et al.,                             | 2012 | We keep on truckin': Trends in freight energy use and carbon emissions in 11 IEA countries                                                                     | Energy Policy                                             | Quantitative | Modelling                         | Unstated | IEA Countries (11) | Policy | Analyses trends in freight CO2 emissions in 11 IEA countries from the earliest year of data availability to 2007–2010. Presents counter evidence for coupling as opposed to decoupling. Identifies policy driven intermodal measures as more viable means for decarbonising freight.                                                                                                                                                                                                               |
| 81 | Léonardi, Jacques; Baumgartner, Michael | 2004 | CO2 efficiency in road freight transportation: Status quo, measures and potential                                                                              | Transportation Research Part D: Transport and Environment | Mixed        | Survey                            | Unstated | Germany            | Policy | Survey of trucking in Germany in spring 2003, found the mean CO2 efficiency (E) is 10.4tkm/ kg CO2. Emission efficiency shows a large variation between 0.8 and 26tkm for 1kg CO2. Identifies deficiencies in implementation measures for improving transport efficiency and makes a case for policy driven information dissemination as well as OBCs for monitoring the success of other operational efficiency measures                                                                          |
| 82 | Li et al.,                              | 2013 | Trends in road freight transportation carbon dioxide emissions and policies in China                                                                           | Energy Policy                                             | Quantitative | Modelling/ Decomposition analysis | Unstated | China              | Policy | Used decomposition analysis to estimate freight transport and economic relationships, with a highlight of policy measures around vehicle specification, modal infrastructure and tolling charges as instrumentation for addressing road freight externalities                                                                                                                                                                                                                                      |
| 83 | Liimatainen et al.,                     | 2012 | Energy efficiency practices among road freight hauliers                                                                                                        | Energy Policy                                             | Quantitative | Survey                            | Unstated | Finland            | Policy | Examines energy efficiency practices amongst road hauliers within the Finnish haulage industry. Common actions include speed limitation, vehicle monitoring and effective deployment. Size is highlighted as a determining factor in energy efficiency amongst firms. Also it provides evidence that voluntary environmental agreements need to be complemented with rethinking the institutional settings that the agreements fit in, in order to overcome barriers of the technological lock-in. |
| 84 | Liimatainen et al.,                     | 2014 | Decarbonizing road freight in the future - Detailed scenarios of the carbon emissions of Finnish road freight transport in 2030 using a Delphi method approach | Technological Forecasting and Social Change               | Mixed        | Delphi Technique                  | Unstated | Finland            | Policy | Delphi method is used to forecast the changes of GDP and seven indicators, which determine the CO2 emissions of road freight. Scenarios are used to forecast demand and reductions with the most positive results yielding 74% decline in CO2 emissions and at least 26% reduction in the worst case; base year is 2010 and projections were for 2030.                                                                                                                                             |
| 85 | M'raihi et al.,                         | 2015 | Carbon emissions growth and road freight: Analysis of the influencing factors in Tunisia                                                                       | Transport Policy                                          | Quantitative | Decomposition Analysis            | Unstated | Tunisia            | Policy | Uses decomposition analysis to examine the driving factors of CO2 emissions in Tunisia. Identifies economic growth as a main driver of CO2 growth with emphasis on limitations of decoupling as a viable strategy due to the fall out the 2010 revolution. Modality, technology and incentivizing are presented as more viable mechanisms                                                                                                                                                          |
| 86 | M'raihi et al.,                         | 2014 | Road Freight Transport and Carbon Dioxide Emissions: Policy Options for Tunisia                                                                                | Energy and Environment                                    | Quantitative | Modelling                         | Unstated | Tunisia            | Policy | Decomposes the CO2 emissions in the Tunisian road freight transport system, identifying fossil fuel as a main factor. Advocates the combination of various policy, operational and decoupling mechanisms for address the emissions problems. Extends a caveat on the limitations of decoupling strategies in the face of infrastructural and intermodal deficiencies.                                                                                                                              |

|    |                        |      |                                                                                       |                                                    |              |                         |          |          |        |                                                                                                                                                                                                                                                                                                                                                                                                                                                                                                                                                                                                                                                                                    |
|----|------------------------|------|---------------------------------------------------------------------------------------|----------------------------------------------------|--------------|-------------------------|----------|----------|--------|------------------------------------------------------------------------------------------------------------------------------------------------------------------------------------------------------------------------------------------------------------------------------------------------------------------------------------------------------------------------------------------------------------------------------------------------------------------------------------------------------------------------------------------------------------------------------------------------------------------------------------------------------------------------------------|
| 87 | Magaritis et al.,      | 2016 | Electrical commercial vehicles: Practical perspectives and future research directions | Research in Transportation Business and Management | Qualitative  | Review                  | Unstated | Europe   | Policy | Paper examines the use of electric commercial vehicles within the spectrum of “green” transport, provides a critique of their key technical specifications and identifies the main operating conditions that influence their effectiveness. It advances policy adjustments for the wider take-up of electric commercial vehicles in daily transport operations within the EU area                                                                                                                                                                                                                                                                                                  |
| 88 | Massara, V.M           | 2012 | Brief Synopsis of the Brazilian Freight Transport and Future Development              | Journal of Infrastructure Development              | Qualitative  | Review                  | Unstated | Brazil   | Policy | Regulation, Inter-modality and Infrastructure directions for advancing the Brazilian freight transport system                                                                                                                                                                                                                                                                                                                                                                                                                                                                                                                                                                      |
| 89 | Matos and Silva        | 2011 | The rebound effect on road freight transport: Empirical evidence from Portugal        | Energy Policy                                      | Quantitative | Modelling               | Unstated | Portugal | Policy | Discusses the rebound effect syndrome and the potential implications for energy consumption and road freight intensity. Findings suggest that operators are more likely to adopt operational objectives over technological efficiencies. Estimated 24.1% rebound effect identified in some case. Implications can extend to overestimated energy consumption savings.                                                                                                                                                                                                                                                                                                              |
| 90 | Mattila and Antikainen | 2011 | Back casting sustainable freight transport systems for Europe in 2050                 | Energy Policy                                      | Quantitative | Modelling/ Back casting | Unstated | Europe   | Policy | Adopts a back casting technique to model freight transport over long distances. Model identified gaps and short comings in current trends and the authors advocate complimentary strategies as critical to achieving sustainable road freight transport by 2050. Study also identifies the need for specific technology road maps that balance costs and benefit distributions                                                                                                                                                                                                                                                                                                     |
| 91 | McKinnon, A. C.        | 2009 | Benchmarking road freight transport: Review of a government-sponsored programme       | Benchmarking: An International Journal             | Qualitative  | Review                  | Unstated | UK       | Policy | Benchmarking SRFT from a government perspective. Policy impetus and convergence with industry benchmarking outcomes                                                                                                                                                                                                                                                                                                                                                                                                                                                                                                                                                                |
| 92 | McKinnon and Piecyk    | 2009 | Measurement of CO2 emissions from road freight transport: A review of UK experience   | Energy Policy                                      | Quantitative | Survey/ Secondary Data  | Unstated | UK       | Policy | Paper highlights some key considerations for improving CO2 measurement using the UK experience as a point of reference. They advocate for greater transparency, common measurement values and data consistency.                                                                                                                                                                                                                                                                                                                                                                                                                                                                    |
| 93 | Piecyk and McKinnon    | 2010 | Forecasting the carbon footprint of road freight transport in 2020                    | International Journal of Production Economics      | Quantitative | Survey/ Delphi          | Unstated | UK       | Policy | Paper presents research undertaken to determine the baseline trends in LSCM and associated environmental effects up to 2020. Factors affecting freight transport demand, truck fuel consumption and related CO2 emissions are classified into six categories in relation to different levels of logistical decision- making. These complexities in the decision-making process and perceptions amongst practitioners lead to different BAU scenarios where the mid-range BAU scenario indicates that the most likely outcome is a marginal reduction in CO2 emissions from road freight transport of around 10% against a 20% increase on road freight intensity from a 2006 base. |

|    |                                                   |      |                                                                                                                   |                                                           |              |                                |          |                 |        |                                                                                                                                                                                                                                                                                                                                                                                                                                                                                                                                                                      |
|----|---------------------------------------------------|------|-------------------------------------------------------------------------------------------------------------------|-----------------------------------------------------------|--------------|--------------------------------|----------|-----------------|--------|----------------------------------------------------------------------------------------------------------------------------------------------------------------------------------------------------------------------------------------------------------------------------------------------------------------------------------------------------------------------------------------------------------------------------------------------------------------------------------------------------------------------------------------------------------------------|
| 94 | Pitera et al                                      | 2017 | The complexity of planning for goods delivery in a shared urban space: A case study involving cyclists and trucks | European Transport Research Review                        | Qualitative  | Case Study                     | Unstated | Europe (Norway) | Policy | Road stakeholders' evaluation focusing on interaction outcomes between trucks and cyclists. Highlights safety implications from the lack of coordination by city planning departments. Councils or city departments lack dedicated urban freight planning capabilities.                                                                                                                                                                                                                                                                                              |
| 95 | Steenhof, Paul; Woudsma, Clarence; Sparling, Erik | 2006 | Greenhouse gas emissions and the surface transport of freight in Canada                                           | Transportation Research Part D: Transport and Environment | Quantitative | Survey/ Decomposition Analysis | Unstated | Canada          | Policy | A decomposition analysis framework is applied to the Canadian freight sector to better understand processes leading to changes in GHG emissions. The framework demonstrates that GHG emissions increase was driven by road freight intensity and countered by multimodality between 1990 and 2003. Policy augmentation for modal shift is advanced.                                                                                                                                                                                                                  |
| 96 | Stelling, P.                                      | 2014 | Policy instruments for reducing CO2 emissions from the Swedish freight transport sector                           | Research in Transportation Business and Management        | Qualitative  | Review                         | Unstated | Sweden          | Policy | Analyses policy instruments for reducing CO2 in Sweden's logistics and freight sector. Economic, Legal, Knowledge and Societal instruments are reviewed with different time implications and relevance for economic and legal (short term), knowledge and societal (long term)                                                                                                                                                                                                                                                                                       |
| 97 | Winebrake et al.,                                 | 2012 | Estimating the direct rebound effect for on-road freight transportation                                           | Energy Policy                                             | Qualitative  | Review                         | Unstated | USA             | Policy | Paper provides a critical review of the literature related to the HDV rebound effect. Results reveal gaps in terms of focused studies in this area. The combination of this gap, the variability and heterogeneity of the trucking sector serve to limit understanding of the rebound effect in the HDV operations                                                                                                                                                                                                                                                   |
| 98 | Zanni and Bristow                                 | 2010 | Emissions of CO2 from road freight transport in London: Trends and policies for long run reductions               | Energy Policy                                             | Quantitative | Survey                         | Unstated | UK              | Policy | Examines the trends and projections for freight transport in the city of London. Raises concerns about the viability of policy and logistics solutions to curb the emissions problems in London by 2050. Analysis of historical emissions shows that from 1996 to 2005 emissions from HGVs and LGVs in London increased by around 18%. Projections show that without further policy interventions these CO2 emissions may increase by an additional 109% by 2050. Combinations of behavioural, technology and policy interventions are commended to aid performance. |

## Appendix A2 – Database Search Structure and Pre-analysis records (Stage 1)

| Date             | Search Words                                                                                                                                                                                                                                                                                                                                                                                                                                                                                                                         |     | Date Range (2001-2016) |   |    |   |    |    |    |    |    |    |    |    |    |     |     |    | Database Hits  |         |                  |      |                | Results Total |     |     |
|------------------|--------------------------------------------------------------------------------------------------------------------------------------------------------------------------------------------------------------------------------------------------------------------------------------------------------------------------------------------------------------------------------------------------------------------------------------------------------------------------------------------------------------------------------------|-----|------------------------|---|----|---|----|----|----|----|----|----|----|----|----|-----|-----|----|----------------|---------|------------------|------|----------------|---------------|-----|-----|
| Last update      |                                                                                                                                                                                                                                                                                                                                                                                                                                                                                                                                      |     | 1                      | 2 | 3  | 4 | 5  | 6  | 7  | 8  | 9  | 10 | 11 | 12 | 13 | 14  | 15  | 16 | Science Direct | Emerald | Taylor & Francis | Sage | Google Scholar |               |     |     |
| 24 February 2016 | "Sustainable Freight"                                                                                                                                                                                                                                                                                                                                                                                                                                                                                                                | SD  | 2                      | 0 | 0  | 0 | 2  | 0  | 1  | 0  | 2  | 4  | 8  | 14 | 7  | 36  | 9   | 5  | 90             |         |                  |      |                | 90            | SD  |     |
| 24 February 2016 | "Sustainable Freight"                                                                                                                                                                                                                                                                                                                                                                                                                                                                                                                | E   | 0                      | 0 | 0  | 0 | 0  | 0  | 0  | 0  | 0  | 0  | 0  | 1  | 2  | 3   | 2   | 0  |                | 16*     |                  |      |                | 16            | E   |     |
| 24 February 2016 | "Sustainable Freight"                                                                                                                                                                                                                                                                                                                                                                                                                                                                                                                | T&F | 0                      | 0 | 0  | 0 | 0  | 0  | 1  | 0  | 1  | 0  | 0  | 1  |    | 1   | 1   | 0  |                |         | 5                |      |                | 5             | T&F |     |
| 24 February 2016 | "Sustainable Freight"                                                                                                                                                                                                                                                                                                                                                                                                                                                                                                                | S   | 0                      | 0 | 0  | 0 | 0  | 0  | 0  | 0  | 0  | 0  | 0  | 0  | 2  | 1   | 1   | 0  |                |         |                  | 4    |                | 4             | S   |     |
| 24 February 2016 | "Sustainable Freight"                                                                                                                                                                                                                                                                                                                                                                                                                                                                                                                | GS  |                        |   |    |   |    |    |    |    |    |    |    |    |    |     |     |    |                |         |                  |      | 965            | 965           | GS  |     |
|                  |                                                                                                                                                                                                                                                                                                                                                                                                                                                                                                                                      |     |                        |   |    |   |    |    |    |    |    |    |    |    |    |     |     |    |                |         |                  |      |                | 1060          |     |     |
| 24 February 2016 | "Green Freight"                                                                                                                                                                                                                                                                                                                                                                                                                                                                                                                      | SD  | 0                      | 0 | 0  | 0 | 0  | 0  | 0  | 0  | 0  | 0  | 0  | 3  | 5  | 9   | 3   | 1  | 21             |         |                  |      |                | 21            | SD  |     |
| 24 February 2016 | "Green Freight"                                                                                                                                                                                                                                                                                                                                                                                                                                                                                                                      | E   | 0                      | 0 | 0  | 0 | 0  | 0  | 0  | 0  | 0  | 0  | 0  | 0  | 0  | 3   | 0   | 0  |                | 3       |                  |      |                | 3             | E   |     |
| 24 February 2016 | "Green Freight"                                                                                                                                                                                                                                                                                                                                                                                                                                                                                                                      | T&F | 0                      | 0 | 0  | 0 | 0  | 0  | 0  | 0  | 0  | 0  | 0  | 2  | 1  |     | 0   | 0  |                |         | 3                |      |                | 3             | T&F |     |
| 24 February 2016 | "Green Freight"                                                                                                                                                                                                                                                                                                                                                                                                                                                                                                                      | S   | 0                      | 0 | 0  | 0 | 0  | 0  | 0  | 0  | 0  | 0  | 0  | 0  | 0  | 0   | 0   | 0  |                |         |                  | 0    |                | 0             | S   |     |
|                  | "Green Freight"                                                                                                                                                                                                                                                                                                                                                                                                                                                                                                                      | GS  |                        |   |    |   |    |    |    |    |    |    |    |    |    |     |     |    |                |         |                  |      |                | 0             | GS  |     |
|                  |                                                                                                                                                                                                                                                                                                                                                                                                                                                                                                                                      |     |                        |   |    |   |    |    |    |    |    |    |    |    |    |     |     |    |                |         |                  |      |                | 27            |     |     |
| 25 February 2016 | "Road freight"***                                                                                                                                                                                                                                                                                                                                                                                                                                                                                                                    | SD  | 10                     | 9 | 11 | 9 | 20 | 16 | 27 | 31 | 49 | 46 | 44 | 73 | 72 | 123 | 120 | 34 | 695            |         |                  |      |                | 695           | SD  |     |
| 25 February 2016 | "Road freight"                                                                                                                                                                                                                                                                                                                                                                                                                                                                                                                       | E   |                        |   |    |   |    |    |    |    |    |    |    |    |    |     |     |    |                | 133     |                  |      |                | 133           | E   | 26^ |
| 25 February 2016 | "Road freight"                                                                                                                                                                                                                                                                                                                                                                                                                                                                                                                       | T&F |                        |   |    |   |    |    |    |    |    |    |    |    |    |     |     |    |                |         | 274              |      |                | 274           | T&F |     |
| 25 February 2016 | "Road freight"                                                                                                                                                                                                                                                                                                                                                                                                                                                                                                                       | S   |                        |   |    |   |    |    |    |    |    |    |    |    |    | 1   |     |    |                |         |                  | 56   |                | 56            | S   |     |
|                  | "Road freight"                                                                                                                                                                                                                                                                                                                                                                                                                                                                                                                       | GS  |                        |   |    |   |    |    |    |    |    |    |    |    |    |     |     |    |                |         |                  |      |                | 0             | GS  |     |
|                  |                                                                                                                                                                                                                                                                                                                                                                                                                                                                                                                                      |     |                        |   |    |   |    |    |    |    |    |    |    |    |    |     |     |    |                |         |                  |      |                | 1158          |     |     |
| 28 March 2016    | "Road freight"                                                                                                                                                                                                                                                                                                                                                                                                                                                                                                                       | SD  | 0                      | 2 | 0  | 1 | 2  | 1  | 5  | 6  | 4  | 5  | 6  | 14 | 11 | 22  | 12  | 7  | 98             |         |                  |      |                |               |     |     |
| 28 March 2016    | "Road freight"                                                                                                                                                                                                                                                                                                                                                                                                                                                                                                                       | E   | 0                      | 0 | 0  | 0 | 0  | 0  | 0  | 0  | 0  | 0  | 0  | 0  | 0  | 0   | 0   | 0  |                |         |                  |      |                |               |     |     |
| 28 March 2016    | "Road freight"                                                                                                                                                                                                                                                                                                                                                                                                                                                                                                                       | T&F | 0                      | 0 | 0  | 0 | 0  | 0  | 0  | 0  | 0  | 0  | 0  | 0  | 0  |     | 1   |    | 1              |         |                  |      |                |               |     |     |
| 28 March 2016    | "Road freight"                                                                                                                                                                                                                                                                                                                                                                                                                                                                                                                       | S   | 0                      | 0 | 0  | 0 | 0  | 0  | 0  | 0  | 0  | 0  | 0  | 0  | 0  | 1   | 0   | 0  | 1              |         |                  |      |                |               |     |     |
| 28 March 2016    | "Road freight"                                                                                                                                                                                                                                                                                                                                                                                                                                                                                                                       | GS  |                        |   |    |   |    |    |    |    |    |    |    |    |    |     |     |    |                |         |                  |      |                |               |     |     |
| 02 March 2016    | "Sustainable road freight" OR "sustainable haulage" OR "road freight sustainability"                                                                                                                                                                                                                                                                                                                                                                                                                                                 | SD  | 0                      | 0 | 0  | 0 | 0  | 0  | 0  | 0  | 0  | 0  | 0  | 0  | 0  | 3   | 4   | 2  | 9              |         |                  |      |                |               |     |     |
| 02 March 2016    | "Sustainable road freight" OR "sustainable haulage" OR "road freight sustainability"                                                                                                                                                                                                                                                                                                                                                                                                                                                 | E   | 0                      | 0 | 0  | 0 | 0  | 0  | 0  | 0  | 0  | 0  | 0  | 0  | 0  | 0   | 0   | 0  | 0              |         |                  |      |                |               |     |     |
| 02 March 2016    | "Sustainable road freight" OR "sustainable haulage" OR "road freight sustainability"                                                                                                                                                                                                                                                                                                                                                                                                                                                 | T&F | 0                      | 0 | 0  | 0 | 0  | 0  | 0  | 0  | 0  | 0  | 0  | 0  | 0  | 0   | 0   | 0  | 0              |         |                  |      |                |               |     |     |
| 02 March 2016    | "Sustainable road freight" OR "sustainable haulage" OR "road freight sustainability"                                                                                                                                                                                                                                                                                                                                                                                                                                                 | S   | 0                      | 0 | 0  | 0 | 0  | 0  | 0  | 0  | 0  | 0  | 0  | 0  | 0  | 0   | 0   | 0  | 0              |         |                  |      |                |               |     |     |
| 02 March 2016    | "Sustainable road freight" OR "sustainable haulage" OR "road freight sustainability"                                                                                                                                                                                                                                                                                                                                                                                                                                                 | GS  |                        |   |    |   |    |    |    |    |    |    |    |    |    |     |     |    |                |         |                  |      |                |               |     |     |
| NOTES            | *Road Freight search in Emerald yielded 133 results, of which 26 were research papers, 6, case studies, chapter items, 6, general review, 4, conceptual papers, 3, review, 1, and 2 literature reviews<br>Of these we took 6 case studies and 26 research papers and 4 general reviews<br>Green freight search for Emerald yielded 3 results. One was an index, 2 papers from 2014 reviewed<br>**No restrictions/quotes<br>*9 items were chapter items that were undated. Of the remaining 7, two items in 2014 were editor profiles |     |                        |   |    |   |    |    |    |    |    |    |    |    |    |     |     |    |                |         |                  |      |                |               |     |     |
|                  |                                                                                                                                                                                                                                                                                                                                                                                                                                                                                                                                      |     |                        |   |    |   |    |    |    |    |    |    |    |    |    |     |     |    |                |         |                  |      |                |               |     |     |
|                  |                                                                                                                                                                                                                                                                                                                                                                                                                                                                                                                                      |     |                        |   |    |   |    |    |    |    |    |    |    |    |    |     |     |    |                |         |                  |      |                |               |     |     |
|                  |                                                                                                                                                                                                                                                                                                                                                                                                                                                                                                                                      |     |                        |   |    |   |    |    |    |    |    |    |    |    |    |     |     |    |                |         |                  |      |                |               |     |     |

Cumulative

265
